# Supplementary material
Source: PubMed Central journal article supplement (PMC2922168)

## Supporting Information:

### Identification and pharmacological characterization of cholesterol-5,6-epoxide hydrolase: a target for tamoxifen.

Philippe de Medina<sup>a,d</sup>, Michael R. Paillasse<sup>a,d</sup>, Gregory Ségala<sup>a,b,c</sup>, Marc Poirot<sup>a,b,c,1</sup> and Sandrine Silvente-Poirot<sup>a,b,c</sup>

<sup>a</sup>INSERM, U563, <sup>b</sup>Institut Claudius Regaud, <sup>c</sup>Université Toulouse III Paul Sabatier, <sup>d</sup>Affichem, Toulouse, France.

<sup>1</sup> Corresponding author

Dr. Marc Poirot

INSERM, U-563, Equipe Métabolisme, Oncogénèse et Différenciation Cellulaire, Centre de Physiopathologie de Toulouse Purpan, Institut Claudius Regaud, 20 rue du Pont Saint Pierre, 31052, Toulouse Cedex; France

Tel: +335 61424648; Fax: +335 61424631; E-mail: [Marc\\_Poirot@hotmail.com](mailto:Marc_Poirot@hotmail.com)

#### SI Material and Methods

**Chemicals:** [<sup>14</sup>C]cholesterol (58 Ci/mol; 1 Ci = 37 GBq) and [<sup>3</sup>H]Tam (81 Ci/mmol) were purchased from General Electric. Sterols, fatty acids, oxysterols and drugs were from Steraloids or Sigma-Aldrich. Nitromiphenone was from Park Davis; raloxifene, RU 39,411 and SR-31747A from Sanofi-Aventis and ICI 182,780 was from Tocris Cookson (UK). BD1008 was a kind gift from Prof. W. Bowen (Brown University, Providence, RI, USA). Other

compounds were synthesized in our laboratory according to published procedures (1, 2). TLC plates (LK-6-DF) were from Whatman. [ $^{14}\text{C}$ ] $\alpha$ - and [ $^{14}\text{C}$ ] $\beta$ -CE (10 Ci/mol) were synthesized as described (3). The solution was diluted in 10 vol of dichloromethane, and the organic layer washed with 10% aqueous sodium sulfite, 5% aqueous sodium hydrogenocarbonate and then water. The reaction mixture was passed through a Sep-Pack cartridge (Vac C18, 1 cc; Waters) equilibrated with MeOH. CE epimers were then separated isocratically by reversed-phase HPLC (Ultrasep ES 100 RP 18, 6.0  $\mu\text{m}$ ; Bischoff, Leonberg, Germany) with MeOH/H<sub>2</sub>O (95:5) as eluant at a flow rate of 0.7 ml/min. The reaction gave 75%  $\alpha$ -CE and 25%  $\beta$ -CE, with a >98% radiochemical purity.

**AEBS ligand binding assays.** For competition and Scatchard assays, AEBS was labeled as described using rat liver microsomes or COS-7 cell microsomal extracts and [ $^3\text{H}$ ]Tam in the presence of 1  $\mu\text{M}$  17 $\beta$ -estradiol to mask residual estrogen receptors (4). 5% dimethylformamide was used to solubilized compounds.

**Chemical synthesis of 5,6-epoxy-cholestan-3 $\beta$ -stearate.** Cholesteryl stearate (204 mg; 0.31 mmol; 1 eq) was dissolved in dichloromethane (5 ml). A solution of meta chloro perbenzoate (102 mg; 0.41 mmol; 1.3 eq) dissolved in dichloromethane (2 ml) was added to the solution and stirred at room temperature for 3 hr. The solution was diluted in 10 vol of dichloromethane, and the organic layer washed with 10% aqueous sodium sulfite, 5% aqueous sodium hydrogenocarbonate and then water and subsequently dried under MgSO<sub>4</sub>. The solution was evaporated, and the white solid was dissolved in 500  $\mu\text{l}$  hexane/diethylether (1:3) and then purified on a silica column. The column was washed with hexane and the synthesis products were eluted with hexane/ethylacetate (8:2) to give a mixture of 5,6 $\alpha$ -

epoxy-cholestan-3 $\beta$ -stearate (70%) and 5,6 $\beta$ -epoxy-cholestan-3 $\beta$ -stearate (30%). Yield: 65%;  $R_F$  (hexane 8/EtOAc 2): 0.56 ( $\alpha$  isomer), 0.58 ( $\beta$  isomer); mass spectroscopy ( $m/z$ ; DCI/ $\text{NH}_3$ ): 669 ( $\text{MH}^+$ ); 686 ( $\text{M-NH}_4^+$ ); 651 ( $\text{MH}^+ - \text{H}_2\text{O}$ ).

### **ChEH activity assays.**

An initial kinetic analysis was carried out to determine the optimum incubation time for the subsequent inhibition experiments. The final assay volume was 150  $\mu\text{l}$  with 130  $\mu\text{l}$  buffer (50 mM Tris, pH 7.4; 150 mM KCl), 10  $\mu\text{l}$  microsomal proteins (15 mg/ml) and 10  $\mu\text{l}$  acetonitrile (6.7%) containing the test compound/drug and the labeled  $\alpha$ -CE. Tubes were incubated at 37°C for increasing periods of time, from 0 to 30 min. The reaction was stopped by immersing the sample in ice-water and adding 1.5 ml chloroform/methanol (2:1) and 500  $\mu\text{l}$  reaction buffer. After shaking, the lower phase was removed and saved, and the aqueous phase was extracted with 1.5 ml chloroform. The two organic layers were mixed, reduced to dryness under a flux of nitrogen and the residue resuspended in 60  $\mu\text{l}$  ethanol. More than 95% of radioactivity was recovered in the organic layers. Samples were applied to silica gel 60, 20  $\times$  20 plates (Fluka, Germany) that had previously been heated for 1 hr at 100°C and were developed using ethylacetate. The regions corresponding to authentic CE and CT standards were visualized by iodine vapor. Radioactive metabolites were visualized using a Storm apparatus (Molecular Dynamics) and quantified by densitometry with the software Imagequant (Molecular Dynamics). Retention factors ( $R_F$ ) were determined for each spot on the TLC plates as the ratio of the distance of migration of the eluate from the origin and the distance of the solvent from the origin.  $\alpha$ -CE had a  $R_F = 0.67$  (top of the TLC, Fig 1), and CT had a  $R_F = 0.25$ . As a result of the initial kinetics, a 9-min incubation and 20  $\mu\text{M}$  [ $^{14}\text{C}$ ] $\alpha$ -CE was chosen for subsequent ChEH inhibition experiments.

**Expression of D8D7I and DHCR7 in COS-7 cells.** Plasmid constructs, COS-7 cell transfection and the measurement of AEBS binding were done as described in (4). For ChEH activity, microsomes were incubated with 20  $\mu\text{M}$  [ $^{14}\text{C}$ ] $\alpha$ -CE for 9 min and were then treated as described in the above paragraph.

**Knockdown of D8D7I and DHCR7 expression in MCF-7 cells.** MCF-7 cells were plated in 10 cm dishes at  $5 \times 10^5$  cells in RPMI medium containing 5% FBS. 24 hours after seeding, the cells were transfected in Opti-MEM with 100 nM Control siRNA (sc-37007, Santa Cruz Biotechnology), 100 nM D8D7I (EBP) siRNA (sc-77218, Santa Cruz Biotechnology) or 50 nM DHCR7 siRNA (sc-60533, Santa Cruz Biotechnology) for 4 h using Oligofectamine (Invitrogen) as recommended by the manufacturer. Cells were harvested at 3 days for enzymatic analyses. To validate the knock-down efficacy, protein levels were analysed on samples under the same conditions. 72 hours after transfection with siRNAs, MCF-7 cells were harvested in RIPA lysis buffer supplemented with protease inhibitors (Roche). Immunoblotting was carried out as described earlier (4). Proteins were separated on a 10% SDS-PAGE gels, electro-transferred onto PVDF membranes and incubated overnight at 4°C with antibodies against human D8D7I (ARP46742, Aviva Systems Biology), human DHCR7 (Ab67664, Abcam) or Actin (C4 Clone, MAB1501, Millipore). Bands were visualized using an ECL plus kit (Amersham Biosciences).

1. Song C, Hiipakka RA, & Liao S (2001) Auto-oxidized cholesterol sulfates are antagonistic ligands of liver X receptors: implications for the development and treatment of atherosclerosis. *Steroids* 66(6):473-479.

2. Poirot M, *et al.* (2000) Synthesis, binding and structure-affinity studies of new ligands for the microsomal anti-estrogen binding site (AEBS). *Bioorg Med Chem* 8(8):2007-2016.
3. Sevanian A & McLeod LL (1986) Catalytic properties and inhibition of hepatic cholesterol-epoxide hydrolase. *J Biol Chem* 261(1):54-59.
4. Kedjouar B, *et al.* (2004) Molecular characterization of the microsomal tamoxifen binding site. *J Biol Chem* 279(32):34048-34061.

## SI figure legend

**Fig.S1.** Scheme describing the reaction of hydration of cholesterol epoxides catalyzed by the Cholesterol-5,6-epoxide hydrolase (ChEH).

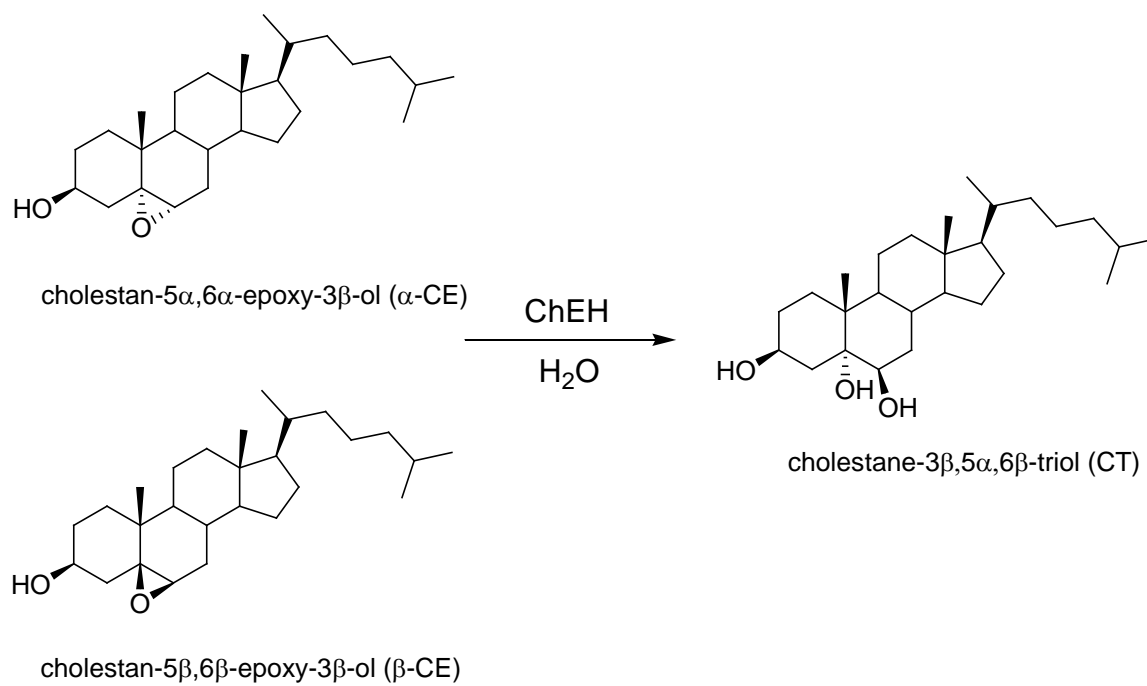

**Fig.S2. Effect of the prototypical AEBS ligands Tam and PBPE on ChEH activity.** A) A time course of ChEH activity. Rat liver microsomes were incubated with 20  $\mu\text{M}$  [ $^{14}\text{C}$ ] $\alpha$ -CE for the indicated time. ChEH activity was assayed by measuring the conversion of  $\alpha$ -CE to CT by TLC. A representative autoradiogram of a TLC from two independent experiments is shown with a plot showing the time course of CT formation by  $\alpha$ -CE hydration. The least-squares regression line was computed over the first 10 min. B) Michaelis-Menten plot of ChEH activity. C) Measurement of ChEH activity in rat liver microsomes using 20  $\mu\text{M}$  [ $^{14}\text{C}$ ] $\alpha$ -CE, solvent vehicle (control), 10  $\mu\text{M}$  6-ketocholestanol (6-KC), 10  $\mu\text{M}$  7-ketocholestanol (7-KC), 1  $\mu\text{M}$  Tam or 1  $\mu\text{M}$  PBPE. A representative autoradiogram of a TLC from three independent experiments is shown. A plot showing the inhibition of ChEH activity on the hydration of  $\alpha$ -CE and  $\beta$ -CE by the test compounds is indicated. The hydration of 20  $\mu\text{M}$  [ $^{14}\text{C}$ ] $\alpha$ -CE or [ $^{14}\text{C}$ ] $\beta$ -CE into CT was inhibited by 10  $\mu\text{M}$  6-ketocholestanol, 10  $\mu\text{M}$  7-ketocholestanol, 1  $\mu\text{M}$  Tam or 1  $\mu\text{M}$  PBPE.

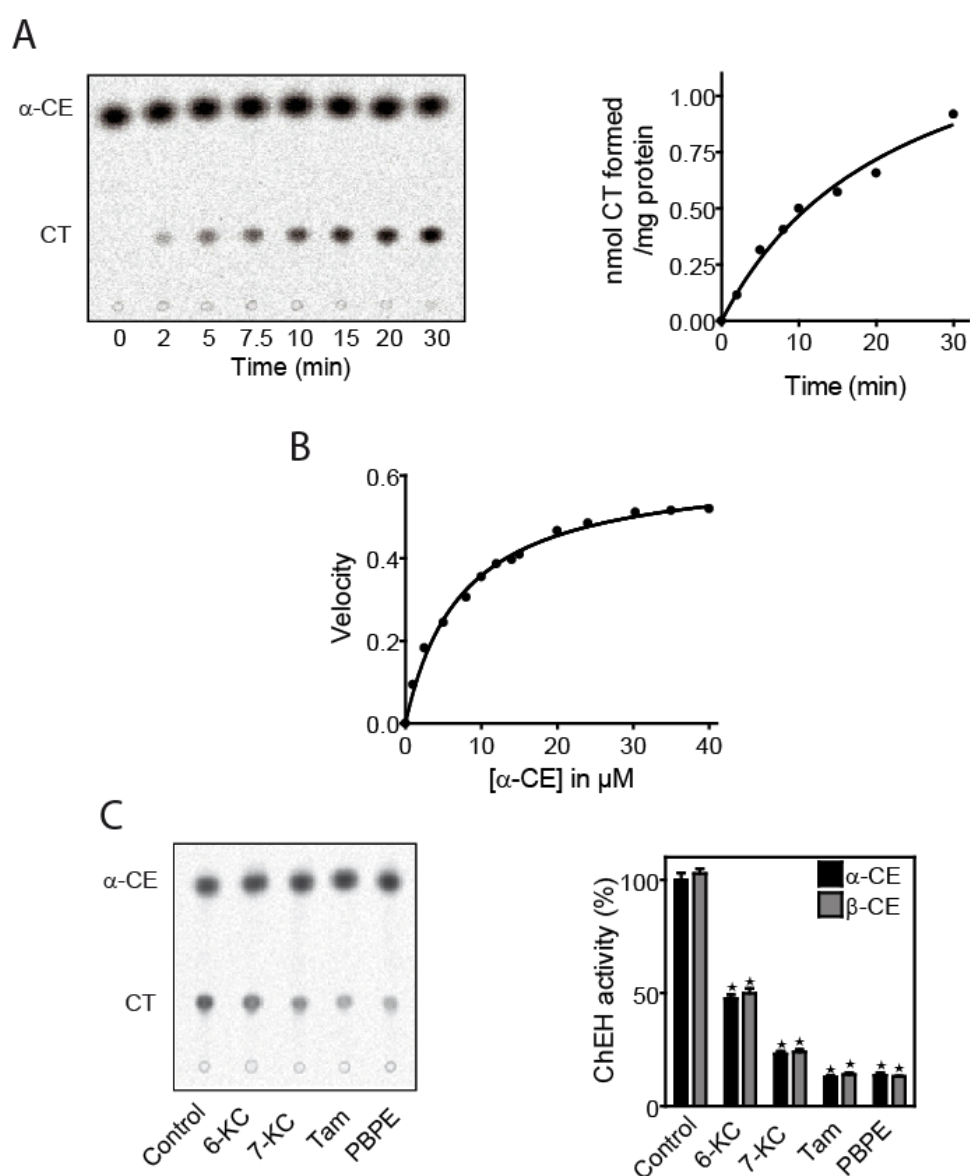

**Fig.S3. Dixon Plot of ChEH inhibition by Tam, PBPE and oleic acid.** The potency of Tam, PBPE and oleic acid to inhibit the ChEH activity was assayed as described in the legend of Fig.2. Dixon plots of [ $^{14}$ C] $\alpha$ -CE versus Tam (A), PBPE (B) or oleic acid (C) with rat liver microsome ChEH. Concentrations in Tam or PBPE used in the assay were: 0, 100, 250, 300, 400, 500, 750 and 1000 nM. Concentrations of oleic acid were: 0, 50, 100, 150, 200 and 250  $\mu$ M.

A

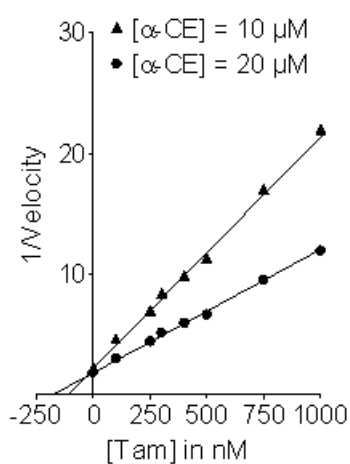

B

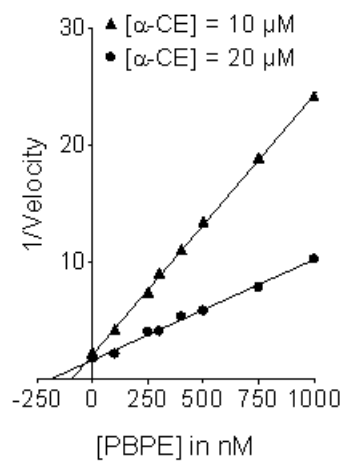

C

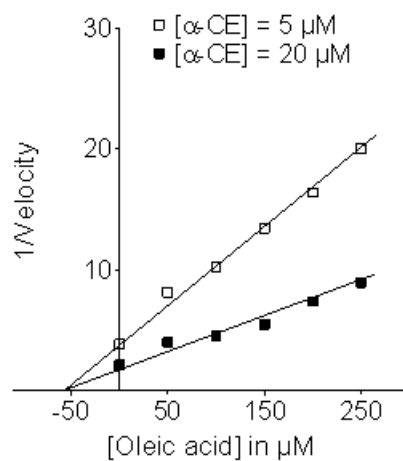



**Table S1. Measurement of the inhibition of [<sup>3</sup>H]Tam binding to the AEBS and catalytic activity of ChEH by drugs.** Rat liver microsomes were incubated with a single concentration of 2.5 nM [<sup>3</sup>H]Tam and increasing concentrations of test compounds ranging from 0.01 to 1000 μM under the condition described in the “Materials and Methods” section. For the ChEH inhibition tests 150 μg of rat liver microsomal proteins and 10 and 20 μM of [<sup>14</sup>C]α-CE with increasing concentrations of compounds ranging from 0.01 to 1000 μM were used under the conditions described in the “Material and Methods” section. N.M.: no measurable inhibition up to the maximal concentration of inhibitor used.

|                                  | <b>Compound</b>          |     | <b>K<sub>i</sub> AEBS</b> | <b>K<sub>i</sub> ChEH</b> |
|----------------------------------|--------------------------|-----|---------------------------|---------------------------|
| <b>Estrogen receptor ligands</b> | 17β-estradiol            | S1  | N.M.                      | N.M.                      |
|                                  | DES                      | S2  | N.M.                      | N.M.                      |
|                                  | ICI 164,384              | S3  | N.M.                      | N.M.                      |
|                                  | ICI 182,780              | S4  | N.M.                      | N.M.                      |
|                                  | RU 58,668                | S5  | N.M.                      | N.M.                      |
| <b>Sigma receptor ligands</b>    | (+)-pentazocine          | S6  | N.M.                      | N.M.                      |
|                                  | (+)-3PPP                 | S7  | N.M.                      | N.M.                      |
|                                  | PRE-084                  | S8  | N.M.                      | N.M.                      |
|                                  | DTG                      | S9  | N.M.                      | N.M.                      |
|                                  | progesterone             | S10 | N.M.                      | N.M.                      |
| <b>Miscalenous</b>               | ketoconazole             | S11 | N.M.                      | N.M.                      |
|                                  | MCH <sub>3</sub> PE      | S12 | N.M.                      | N.M.                      |
| <b>Side chain oxysterols</b>     | 22(R)-hydroxycholesterol | S13 | N.M.                      | N.M.                      |
|                                  | 24(S)-hydroxycholesterol | S14 | N.M.                      | N.M.                      |
|                                  | 25-hydroxycholesterol    | S15 | N.M.                      | N.M.                      |
|                                  | 26-hydroxycholesterol    | S16 | N.M.                      | N.M.                      |
| <b>Epoxysterol-esters</b>        | α-CE-sulfate             | S17 | N.M.                      | N.M.                      |
|                                  | CE-stearate              | S18 | N.M.                      | N.M.                      |
| <b>Fatty acids and ester</b>     | palmitic acid            | S19 | N.M.                      | N.M.                      |
|                                  | stearic acid             | S20 | N.M.                      | N.M.                      |
|                                  | oleic acid methyl ester  | S21 | N.M.                      | N.M.                      |

**Fig.S4. trivial names, IUPAC names and chemical structure of selective AEBS ligands (A) and estrogen receptor modulators (B) that bind to the AEBS and inhibit ChEH.**

PBPE: 1-(2-(4-benzylphenoxy)ethyl)-pyrrolidin; PCPE: 1-(2-(4-(2-phenylpropan-2-yl)phenoxy)ethyl)pyrrolidine; tesmilifene: 2-(4-benzylphenoxy)-N,N-diethylethanamine, MBPE: 4-(2-(4-benzylphenoxy)ethyl)morpholine; MCPE: 4-(2-(4-(2-phenylpropan-2-yl)phenoxy)ethyl)morpholine; PCOPE: phenyl(4-(2-(pyrrolidin-1-yl)ethoxy)phenyl)methanone; MCOPE: (4-(2-morpholinoethoxy)phenyl)(phenyl)methanone; MCOCH2PE: 1-(4-(2-morpholinoethoxy)phenyl)-2-phenylethanone; tamoxifen: 2-[4-[(Z)-1,2-di(phenyl)but-1-enyl]phenoxy]-N,N-dimethylethanamine; 4OH-tam: 4-[(Z)-1-[4-(2-dimethylaminoethoxy)phenyl]-2-phenyl but-1-enyl]phenol; raloxifene: [6-hydroxy-2-(4-hydroxyphenyl)-1-benzothiophen-3-yl]-[4-(2-piperidin-1-ylethoxy)phenyl]methanone; nitromiphene: 1-[2-[4-[(Z)-1-(4-methoxyphenyl)-2-nitro-2-phenylethenyl]phenoxy]ethyl]pyrrolidine; clomiphene: 2-[4-[(Z)-2-chloro-1,2-di(phenyl)ethenyl]phenoxy]-N,N-diethylethanamine; RU 39,411: 11-[4-N,N-[diethylamino ethoxy]phenyl]-estra-1,3,5(10)triene-3,17-diol.

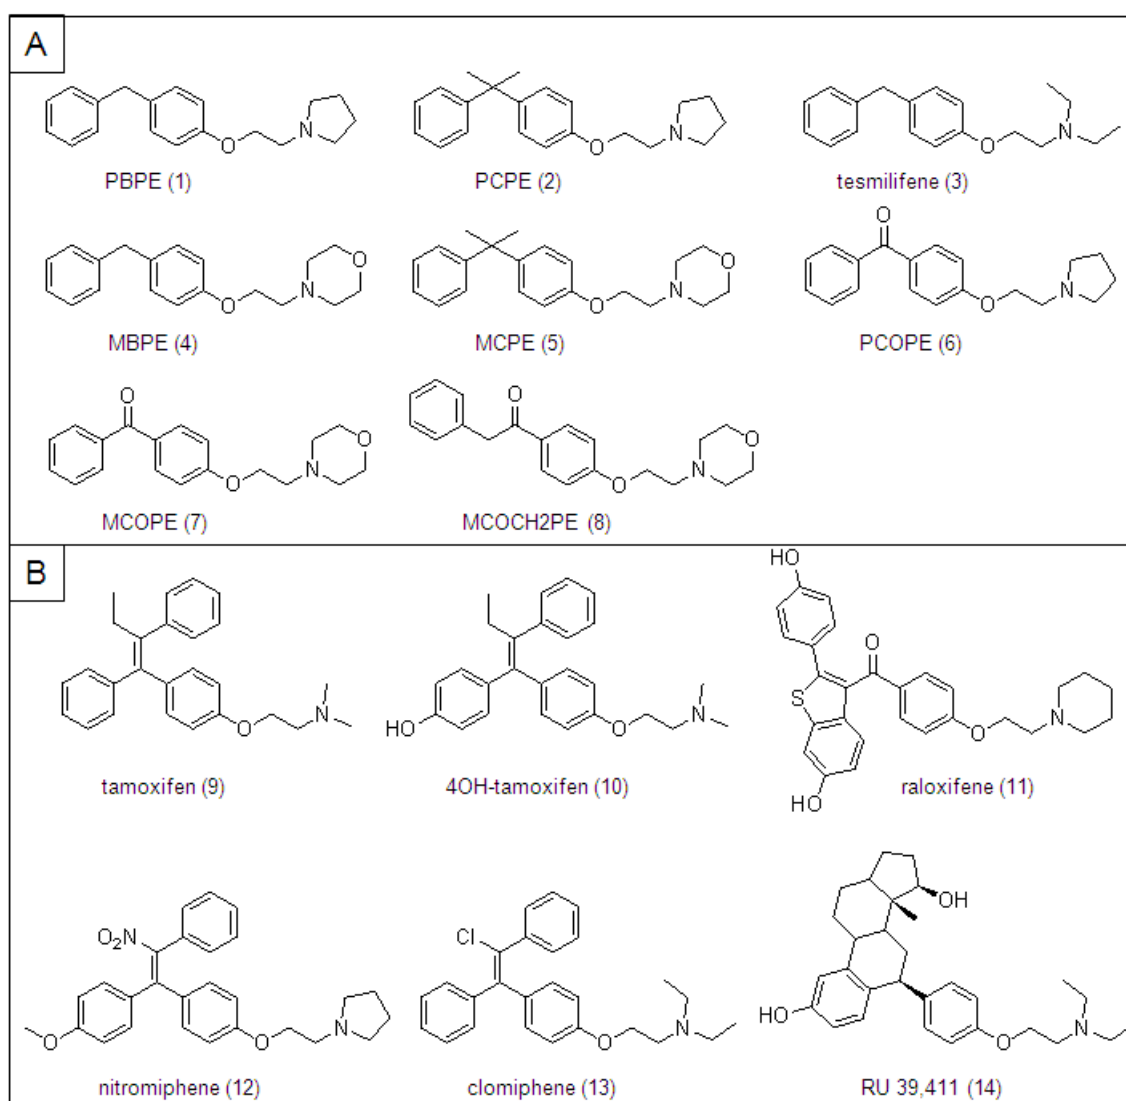

**Fig.S5. name and chemical structure of Sigma-receptor ligands (A) and cholesterol biosynthesis inhibitors (B) that bind to the AEBS and inhibit ChEH.** BD-1008: N-(3,4-dichlorophenethyl)-N-methyl-2-(pyrrolidin-1-yl)ethanamine; Haloperidol: 4-(4-(4-chlorophenyl)-4-hydroxypiperidin-1-yl)-1-(4-fluorophenyl)butan-1-one; SR-31747A: (E)-N-(4-(3-chloro-4-cyclohexylphenyl)but-3-enyl)-N-ethylcyclohexanamine; RO 48-8071: (4-(6-(allyl(methyl)amino)hexyloxy)phenyl)(4-bromophenyl)methanone; U-18666A: 3-beta-(2-(diethylamino)ethoxy)androst-5-en-17-one; AY-9944: trans-1,4-Bis(2-chlorobenzaminomethyl)cyclohexane; Triparanol: 2-(4-chlorophenyl)-1-(4-(2-(diethylamino)ethoxy)phenyl)-1-p-tolylethanol; terbinafine: (E)-N,3,6,6-tetra methyl-N-(naphthalene-1-ylmethyl)hept-2-en-4-yn-1-amine; SKF-525A: 2-diethylaminoethyl 2,2-diphenylpentanoate.

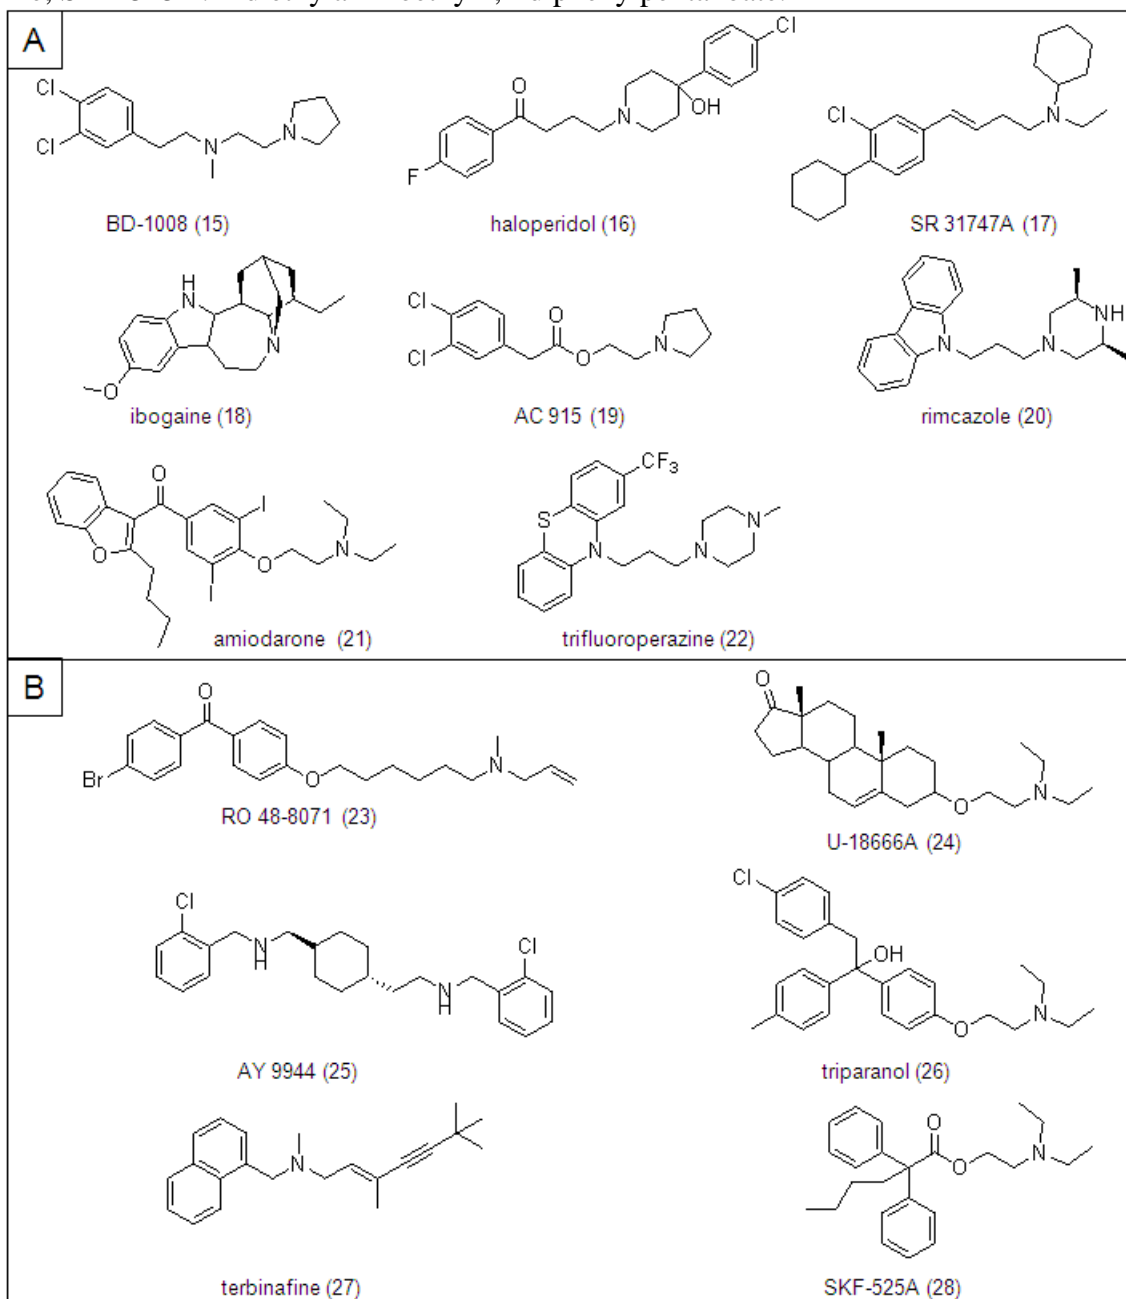

**Fig.S6. Trivial name, chemical name and chemical structure of ring B oxysterols and fatty acids that bind to the AEBS and that inhibit ChEH.**

6-ketocholestanol:  $5\alpha$ -cholestan- $3\beta$ -ol-6-one; 7-ketocholestanol:  $5\alpha$ -cholestan- $3\beta$ -ol-7-one; 7-ketocholesterol: 5-cholesten- $3\beta$ -ol-7-one;  $7\alpha$ -hydroxycholesterol: 5-cholesten- $3\beta,7\alpha$ -diol;  $7\beta$ -hydroxycholesterol: 5-cholesten- $3\beta,7\beta$ -diol; 6-keto- $5\alpha$ -hydroxycholestanol: cholestan- $3\beta,5\alpha$ -diol-6-one; oleic acid: (Z)-octadec-9-enoic acid;  $\alpha$ -linolenic acid: (9Z,12Z,15Z)-octadeca-9,12,15-trienoic acid; arachidonic acid: (5Z,8Z,11Z,14Z)-icosa-5,8,11,14-tetraenoic acid; docosahexaenoic acid: (4Z,7Z,10Z,13Z,16Z,19Z)-docosa-4,7,10,13,16,19-hexaenoic acid.

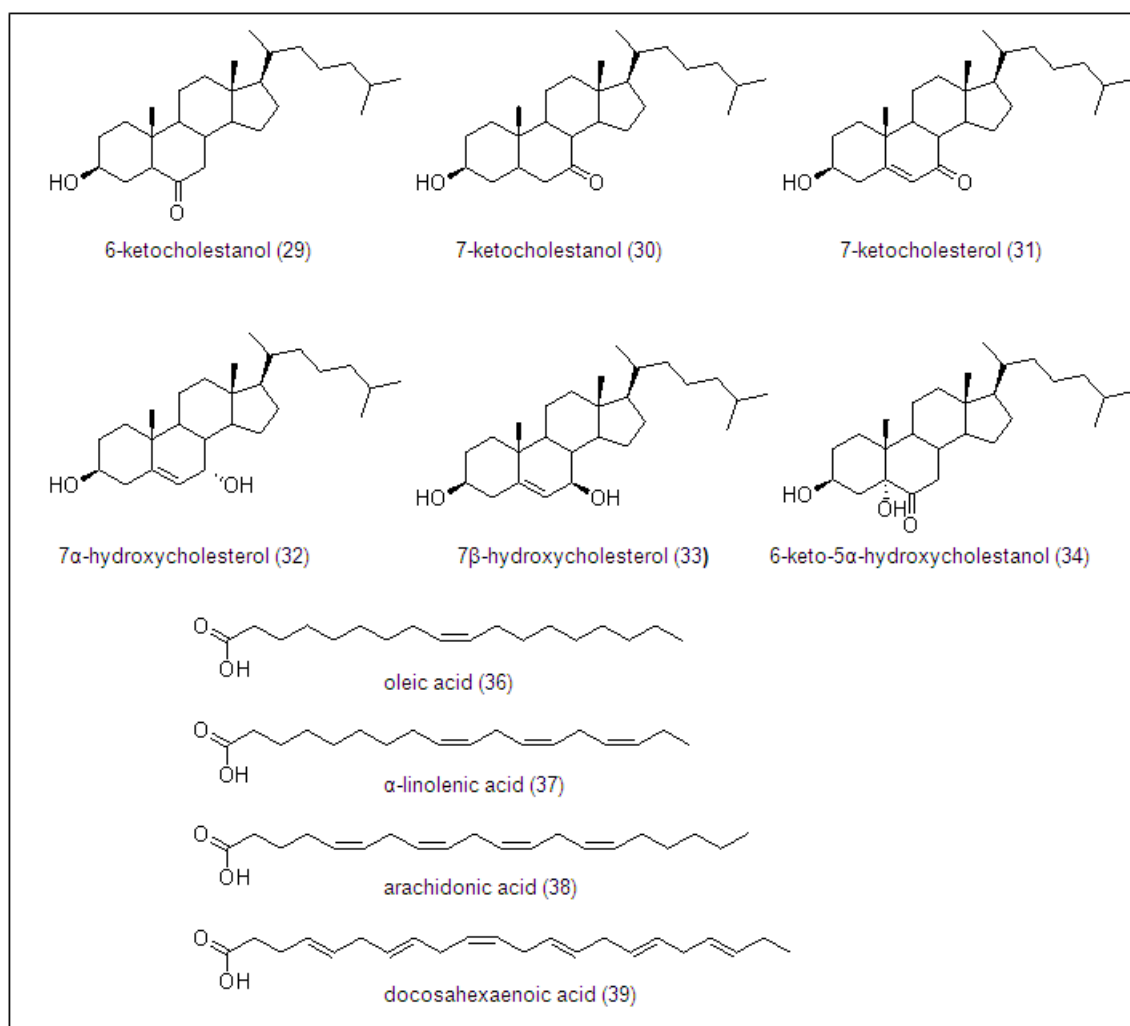

**Fig.S7.Trivial name, chemical name and chemical structure of compounds that do not bind to the AEBS and do not inhibit ChEH up to 10  $\mu$ M (compounds S2-S5) or 1000  $\mu$ M (S6-S12).** ICI 164,384: [(*N*-*n*-butyl-*N*-methyl-11-[3,17-di-hydroxyestra-1,3,5(10)-trien-7-yl]-undecanamide)]; ICI 182,780: Faslodex, fulvestrant, 7- $\alpha$ -[9-(4,4,5,5,5-pentafluoropentylsulfinyl)nonyl]estra-1,3,5(10)-triene-3,17- $\beta$ -diol; RU 58668: 11-[[[(4,4,5,5,5,-pentafluoropentyl)sulfonyl]pentyloxy]phenyl]-estra-1,3,5(10)-triene-3,17- $\beta$ -diol; (+)-3PPP: (*R*)-3-(1-propylpiperidin-3-yl)phenol; PRE-084: 2-morpholinoethyl-1-phenyl cyclohexanecarboxy late; DTG: 1,3-dio-tolylguanidine; progesterone; ketoconazole: 1-(4-(((2*R*,4*S*)-2-((1*H*-imidazol-1-yl)methyl)-2-(2,4-dichlorophenyl)-1,3-dioxolan-4-yl)methoxy)phenyl)piperazin-1-yl) ethanone; MCH3PE: 4-(2-(*p*-toloxy)ethyl)morpholine.

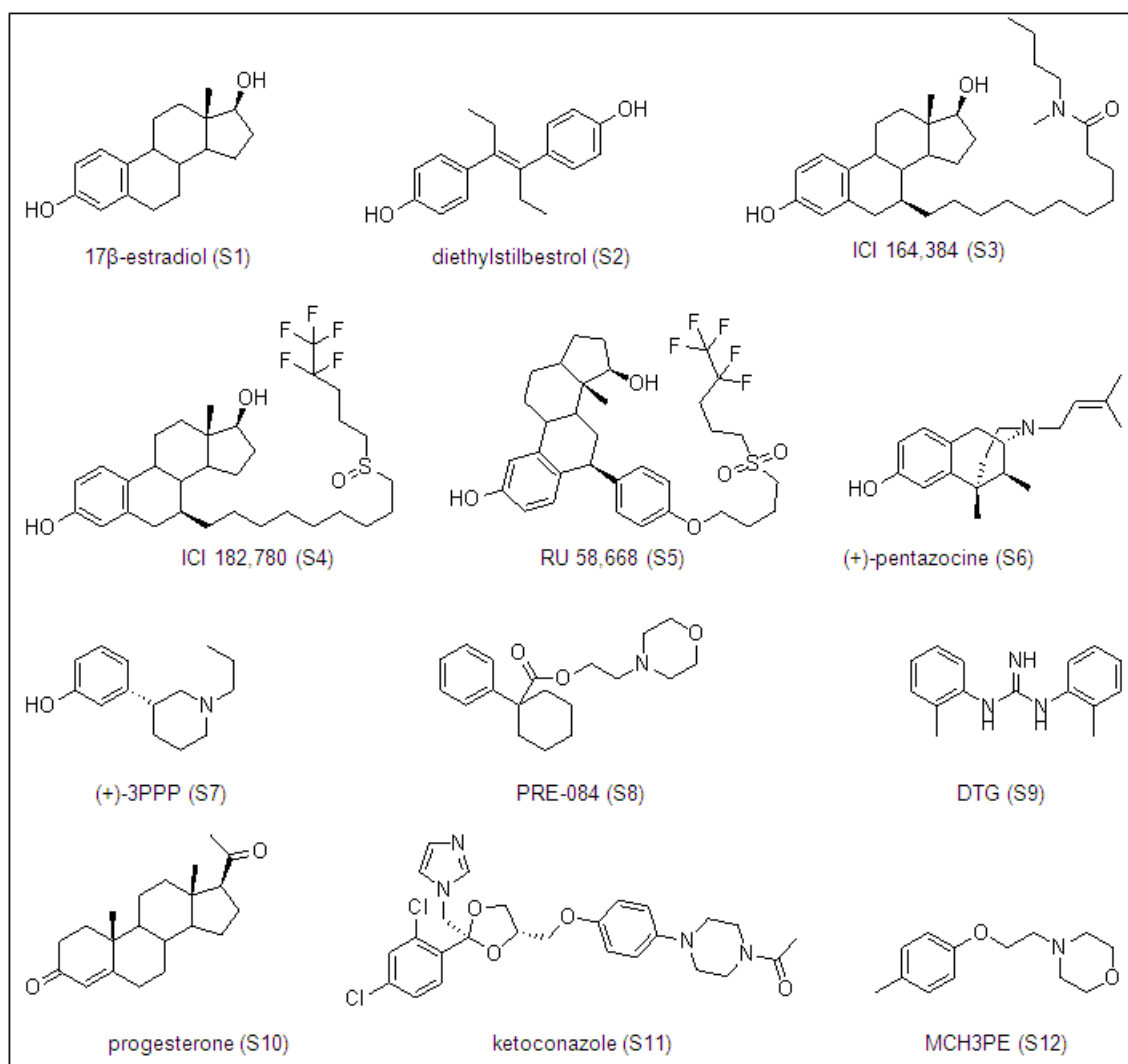

**Fig.S8. Trivial name, chemical name and chemical structure of side chain oxysterols and fatty acids that do not bind to the AEBS and do not inhibit ChEH up to 50  $\mu$ M.**

22(R)-hydroxycholesterol: 5-cholestene-3 $\beta$ ,22R-diol; 24(S)-hydroxycholesterol: 5-cholestene-3 $\beta$ ,24(S)-diol; 25-hydroxycholesterol: 5-cholestene-3 $\beta$ ,25-diol; 26-hydroxycholesterol: 5-cholestene-3 $\beta$ ,26-diol;  $\alpha$ -CE-sulfate: cholestan-5 $\alpha$ ,6 $\alpha$ -epoxy-ol-3 $\beta$ -sulfate; CE-stearate: cholestan-5,6-epoxy-3 $\beta$ -ol-stearate; palmitic acid: hexadecanoic acid; stearic acid: octadecanoic acid;

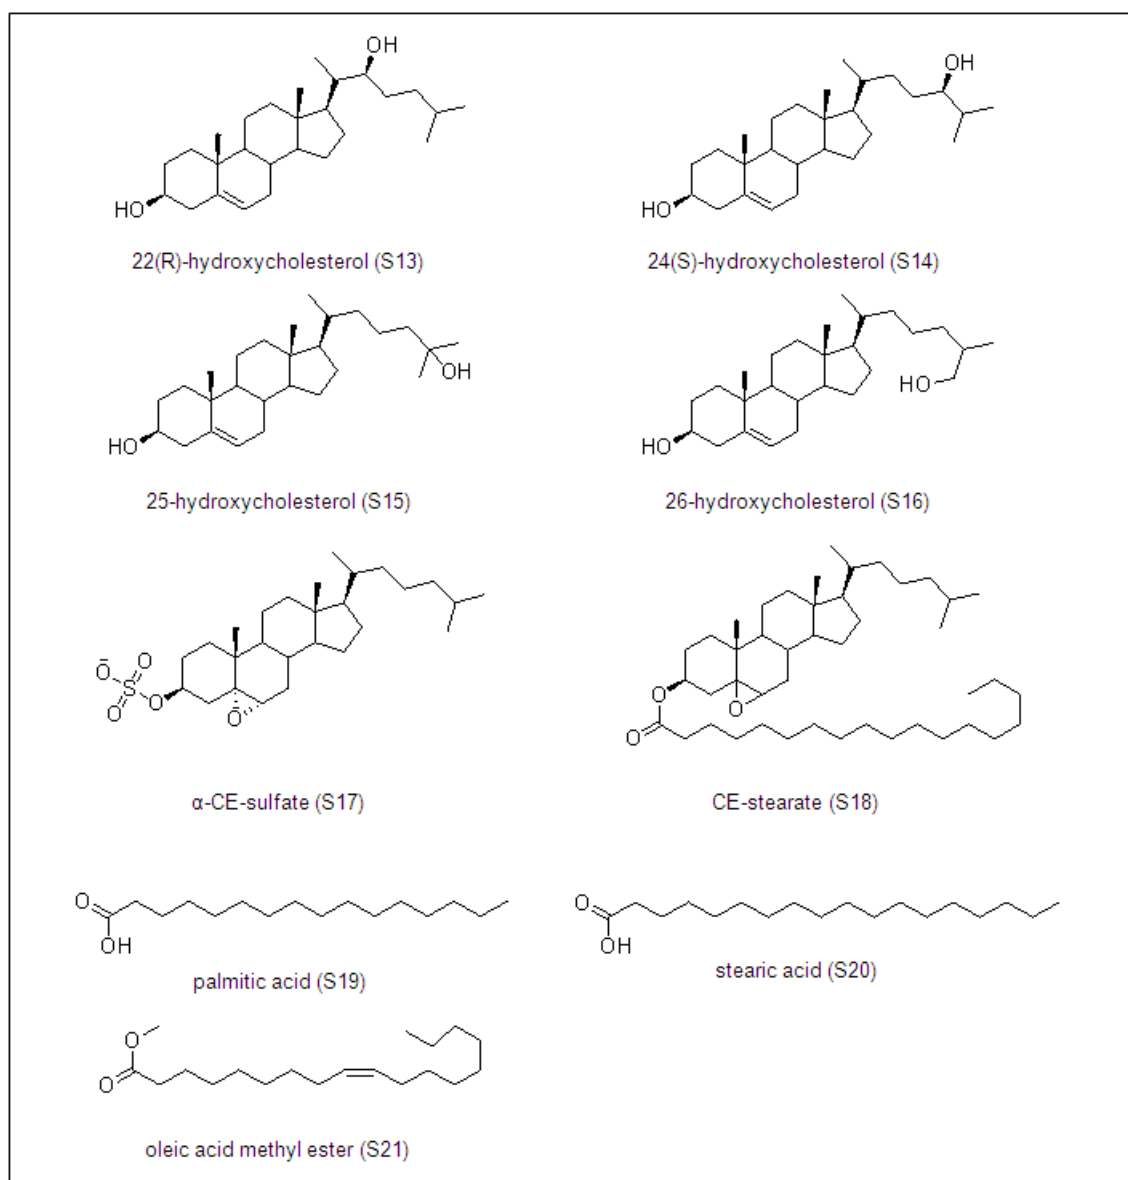

Supplement: 1002922107_sapp.pdf [file 1002922107_sapp.pdf]
